# Supplementary material for: Jiao-tai-wan Improves Cognitive Impairment by Regulating Nrf2/ARE/HO-1 Signaling Pathway in APP/PS1 mice
Source: Research Square preprint supplement (doi:10.21203/rs.3.rs-6265210/v1), 2025-04-23
Supplement: Supplementary file 1 [file 8be4c464e1c4ca4f6c6a7d85.docx]

| **Supplementary Materials**  **Table 1(S1). The primer sequence of the target gene used for the PCR analysis** | | |
| --- | --- | --- |
| Gene | **Forward primer, 5'-3'** | **Reverse primer, 5'-3'** |
| ß-actin | 5’-TAAAGACCTCTATGCCAACACAGT-3’ | 5’- CACGATGGAGGGGCCGGACTCATC-3’ |
| BDNF | 5’- TCATACTTCGGTTGCATGAAGG -3’ | 5’-AGACCTCTCGAACCTGCCC -3’ |
| NGF | 5’- CCAAGGACGCAGCTTTCTAT -3’ | 5-’CTCCGGTGAGTCCTGTTGAA-3’ |
| SYP | 5’-AGACATGGACGTGGTGAATCA-3’ | 5’- ACTCTCCGTCTTGTTGGCAC-3’ |


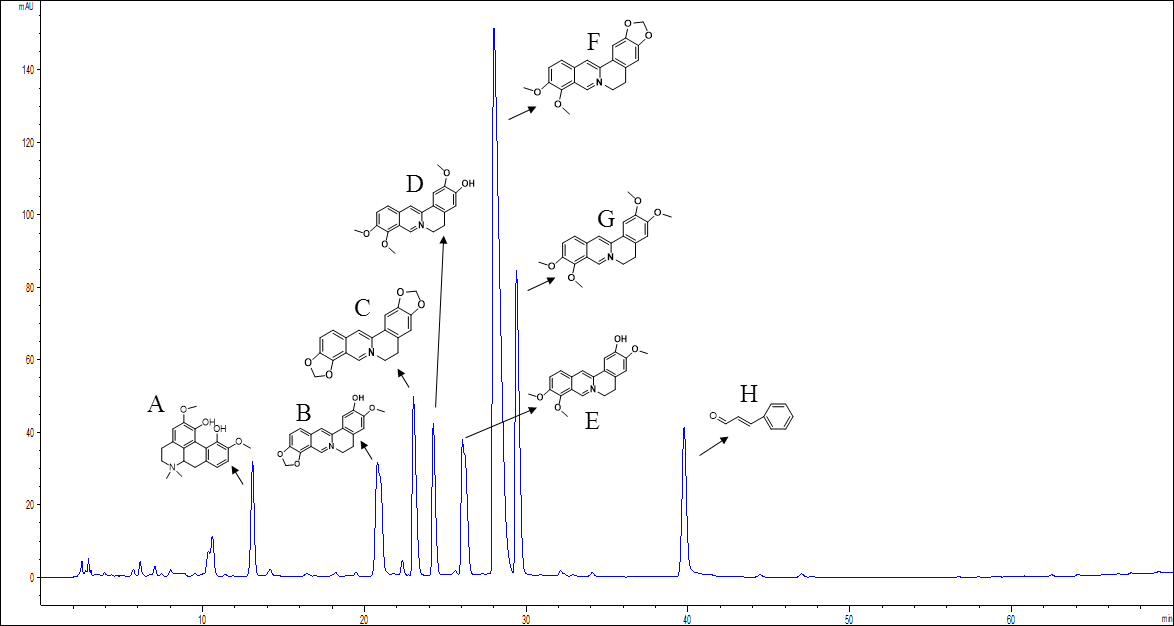


（a）

**
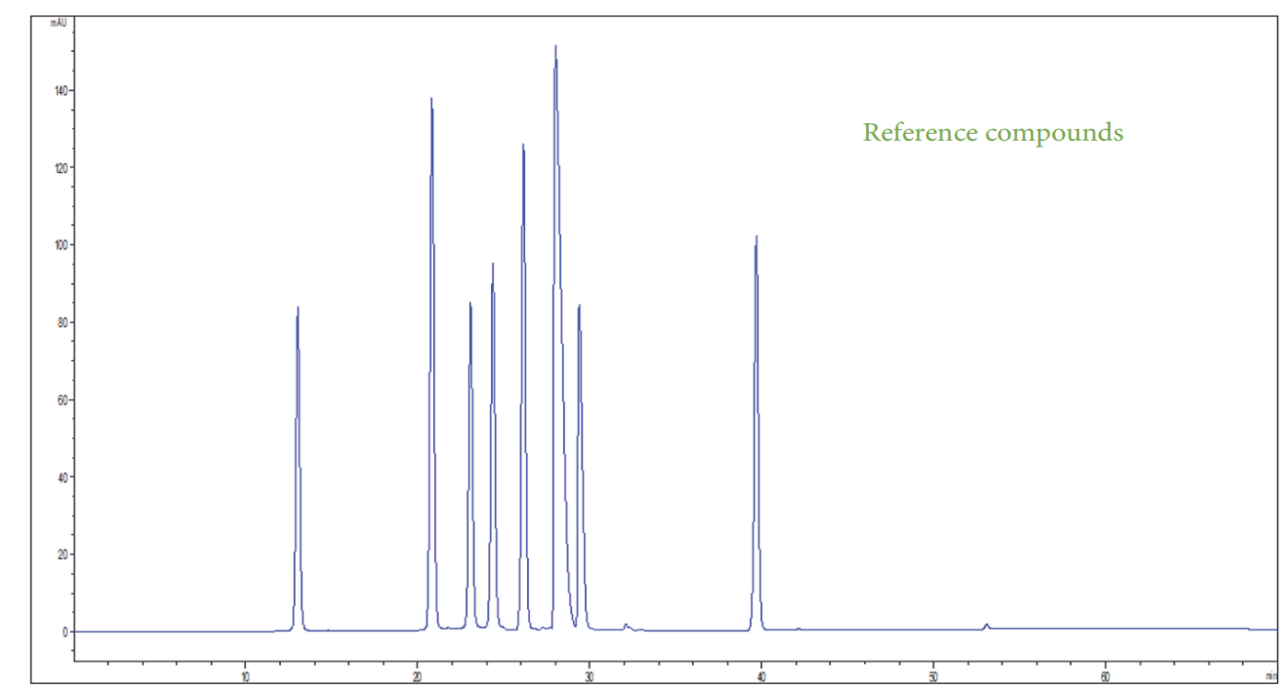
**

（b）

**Figure 1(S2). HPLC of JTW. HPLC profiles were applied to analyzed chemical standardization of JTW and reference compounds. (a) JTW samples; (b) reference compounds[9].（Have published）**
